# Supplementary material for: Infection and genotype remodel the entire soybean transcriptome
Source: PubMed Central journal article supplement (PMC2662884; doi:10.1186/1471-2164-10-49), 2009-01-26
Supplement: 1471-2164-10-49-S2.pdf [file 1471-2164-10-49-S2.pdf]

**Supplemental Table 1.** Intersection of six non-random sub-groups with the whole experiment.

| Experiment <sup>a</sup> |                           | Genotype x Treatment <sup>b</sup> |        |        |        | Genotype <sup>b</sup> |        | Treatment <sup>b</sup> |        |        |
|-------------------------|---------------------------|-----------------------------------|--------|--------|--------|-----------------------|--------|------------------------|--------|--------|
|                         |                           | 0.05 <sup>c</sup>                 | 0.01   | 0.001  | 0.05   | 0.01                  | 0.001  | 0.05                   | 0.01   | 0.001  |
| Whole (W)               | Significant <sup>d</sup>  | 26,500                            | 24,669 | 22,381 | 27,156 | 25,923                | 24,191 | 27,732                 | 27,139 | 26,351 |
| Sub A                   | Significant               | 11,710                            | 6,302  | 2,769  | 14,930 | 7,961                 | 3,583  | 20,902                 | 16,296 | 11,138 |
|                         | Intersection <sup>e</sup> | 11,635                            | 6,269  | 2,761  | 14,842 | 7,913                 | 3,543  | 20,855                 | 16,277 | 11,118 |
|                         | % of A <sup>f</sup>       | 99.4                              | 99.5   | 99.7   | 99.4   | 99.4                  | 98.9   | 99.8                   | 99.9   | 99.8   |
|                         | % of W <sup>f</sup>       | 43.9                              | 25.4   | 12.3   | 54.7   | 30.5                  | 14.6   | 75.2                   | 60.0   | 42.2   |
| Sub B                   | Significant               | 13,292                            | 8,225  | 4,366  | 15,263 | 8,655                 | 3,852  | 21,879                 | 17,374 | 11,835 |
|                         | Intersection              | 13,252                            | 8,210  | 4,363  | 15,224 | 8,640                 | 3,845  | 21,870                 | 17,369 | 11,830 |
|                         | % of B                    | 99.7                              | 99.8   | 99.9   | 99.7   | 99.8                  | 99.8   | 100                    | 100    | 100    |
|                         | % of W                    | 50.0                              | 33.3   | 19.5   | 56.1   | 33.3                  | 15.9   | 78.9                   | 64     | 44.9   |
| Sub C                   | Significant               | 15,913                            | 10,610 | 6,114  | 17,421 | 10,891                | 5,307  | 23,124                 | 19,452 | 14,854 |
|                         | Intersection              | 15,755                            | 10,516 | 6,081  | 17,378 | 10,863                | 5,287  | 23,088                 | 19,419 | 14,836 |
|                         | % of C                    | 99.0                              | 99.1   | 99.5   | 99.8   | 99.7                  | 99.6   | 99.8                   | 99.8   | 99.9   |
|                         | % of W                    | 59.5                              | 42.6   | 27.2   | 64.0   | 41.9                  | 21.9   | 83.3                   | 71.6   | 56.3   |
| Sub D                   | Significant               | 15,834                            | 10,917 | 6,348  | 19,559 | 13,968                | 7,508  | 23,470                 | 19,879 | 14,377 |
|                         | Intersection              | 15,731                            | 10,850 | 6,331  | 19,519 | 13,935                | 7,480  | 23,440                 | 19,867 | 14,369 |
|                         | % of D                    | 99.3                              | 99.4   | 99.7   | 99.8   | 99.8                  | 99.6   | 99.9                   | 99.9   | 99.9   |
|                         | % of W                    | 59.4                              | 44.0   | 28.3   | 71.9   | 53.8                  | 30.9   | 84.5                   | 73.2   | 54.5   |
| Sub E                   | Significant               | 17,081                            | 11,666 | 6,611  | 20,461 | 13,554                | 6,508  | 22,812                 | 18,590 | 12,739 |
|                         | Intersection              | 16,961                            | 11,603 | 6,590  | 20,270 | 13,405                | 6,417  | 22,776                 | 18,568 | 12,733 |
|                         | % of E                    | 99.3                              | 99.5   | 99.7   | 99.1   | 98.9                  | 98.6   | 99.8                   | 99.9   | 100    |
|                         | % of W                    | 64.0                              | 47.0   | 29.4   | 74.6   | 51.7                  | 26.5   | 82.1                   | 68.4   | 48.3   |
| Sub F                   | Significant               | 15,270                            | 9,761  | 5,402  | 19,952 | 13,767                | 7,774  | 23,697                 | 20,229 | 15,568 |
|                         | Intersection              | 15,064                            | 9,640  | 5,344  | 19,846 | 13,704                | 7,739  | 23,650                 | 20,190 | 15,546 |
|                         | % of F                    | 98.7                              | 98.8   | 98.9   | 99.5   | 99.5                  | 99.5   | 99.8                   | 99.8   | 99.9   |
|                         | % of W                    | 56.8                              | 39.1   | 23.9   | 73.1   | 52.9                  | 32.0   | 85.3                   | 74.4   | 59.0   |

<sup>a</sup>The whole experiment (W) was split into six sub-groups (Sub A, B, C, D, E, and F, each with 4 blocks), in the order the blocks were performed. <sup>b</sup>Genotype x Treatment, Genotype (V71-370, Sloan and VPRIL9) and Treatment (Upper, Lower, and Mock) were fixed factors used in the linear mixed model analysis. Model:  $y = \text{Genotype} + \text{Treatment} + \text{Time} + \text{Genotype} \times \text{Treatment} + \text{Block} + \text{Block} \times \text{Genotype} + \text{Block} \times \text{Treatment} + \text{Block} \times \text{Time} + \text{Block} \times \text{Genotype} \times \text{Treatment} + \text{Error}$ , where y refers to the log2 scale median polish summarized gene expression values, the main factors (Genotype,

Treatment and Time) and the interaction Genotype x Treatment were fixed factors while all the remaining terms were random factors. <sup>c</sup>FDR (TST) adjusted p value cutoffs used to determine significance. <sup>d</sup>The number of genes significant for the factor of interest at the indicated cutoff from the whole experiment or a sub-group experiment, as revealed by LMMA analysis of GC-RMA preprocessed data. <sup>e</sup>Intersection indicates the number of genes significant in both the whole experiment (W) and in the relevant sub-group experiment. <sup>f</sup>Number of significant genes in the intersection as a percentage of the number of significant genes from the sub-group (e.g. A) or the whole experiment (W), respectively.
