# Supplementary material for: Infection and genotype remodel the entire soybean transcriptome
Source: PubMed Central journal article supplement (PMC2662884; doi:10.1186/1471-2164-10-49), 2009-01-26
Supplement: 1471-2164-10-49-S3.pdf [file 1471-2164-10-49-S3.pdf]

**Supplemental Table 2.** Comparisons among the intersection or union of the sub-groups and the whole experiment

| FDR <sup>a</sup> | Fixed Factor <sup>b</sup> | Whole <sup>c</sup>       |             | Intersection <sup>e</sup> |             | Union <sup>g</sup>   |                         |                         |
|------------------|---------------------------|--------------------------|-------------|---------------------------|-------------|----------------------|-------------------------|-------------------------|
|                  |                           | Significant <sup>d</sup> | significant | Matches <sup>f</sup>      | significant | Matches <sup>h</sup> | % of union <sup>i</sup> | % of whole <sup>j</sup> |
| 0.05             | Genotype                  | 27,156                   | 8,845       | 8,845                     | 25,969      | 25,543               | 98.4                    | 94.1                    |
|                  | Treatment                 | 27,732                   | 16,914      | 16,914                    | 27,012      | 26,845               | 99.4                    | 96.8                    |
|                  | G x T                     | 26,500                   | 5,424       | 5,424                     | 24,994      | 24,383               | 97.6                    | 92                      |
|                  | Time                      | 9,960                    | 43          | 43                        | 8,313       | 5,034                | 60.6                    | 50.5                    |
| 0.01             | Genotype                  | 25,923                   | 3,107       | 3,107                     | 21,633      | 21,326               | 98.6                    | 82.3                    |
|                  | Treatment                 | 27,139                   | 11,137      | 11,137                    | 24,944      | 24,829               | 99.5                    | 91.5                    |
|                  | G x T                     | 24,669                   | 2,321       | 2,321                     | 19,323      | 18,952               | 98.1                    | 76.8                    |
|                  | Time                      | 4,453                    | 9           | 9                         | 2,594       | 1,457                | 56.2                    | 32.7                    |
| 0.001            | Genotype                  | 24,191                   | 460         | 460                       | 16,148      | 15,937               | 98.7                    | 65.9                    |
|                  | Treatment                 | 26,351                   | 4,174       | 4,174                     | 22,388      | 22,312               | 99.7                    | 84.7                    |
|                  | G x T                     | 22,381                   | 597         | 597                       | 12,922      | 12,785               | 98.9                    | 57.1                    |
|                  | Time                      | 2,025                    | 0           | 0                         | 806         | 480                  | 59.6                    | 23.7                    |
| 0.0001           | Genotype                  | 22,611                   | 84          | 84                        | 12,233      | 12,090               | 98.8                    | 53.5                    |
|                  | Treatment                 | 25,560                   | 839         | 839                       | 20,141      | 20,084               | 99.7                    | 78.6                    |
|                  | G x T                     | 20,293                   | 138         | 138                       | 8,803       | 8,737                | 99.3                    | 43.1                    |
|                  | Time                      | 1,173                    | 0           | 0                         | 372         | 226                  | 60.8                    | 19.3                    |

<sup>a</sup>FDR refers to p value cutoff following false discovery rate control with the two-stage linear step-up method (TST-FDR). <sup>b</sup>The fixed factors used in the LMMA model included genotype (V71-370, Sloan and VPRIL9), treatment (Upper, Lower, and Mock), time (9 am, 10:30 am, and 12 pm), and the genotype x treatment interaction (G x T). <sup>c</sup>The whole 24 block experiment. <sup>d</sup>The number of significant genes revealed by LMMA analysis of GC-RMA preprocessed data at the designed p value cutoff. <sup>e</sup>The number of significant genes found in all the 6 sub-groups. <sup>f</sup>The number of genes found significant in both the intersection of all the sub-groups and in the whole experiment. No genes were found in the intersection but not the whole. <sup>g</sup>The number of genes found significant in at least one of the sub-group experiments. <sup>h</sup>The number of genes found significant in both the Union of the sub-group results and in the whole experiment. <sup>i</sup>The number of matching genes as a percentage of the total number of significant genes in the Union. <sup>j</sup>The number of matching genes as a percentage of the total number of significant genes discovered in the whole experiment.
