# Supplementary material for: Infection and genotype remodel the entire soybean transcriptome
Source: PubMed Central journal article supplement (PMC2662884; doi:10.1186/1471-2164-10-49), 2009-01-26
Supplement: 1471-2164-10-49-S4.pdf [file 1471-2164-10-49-S4.pdf]

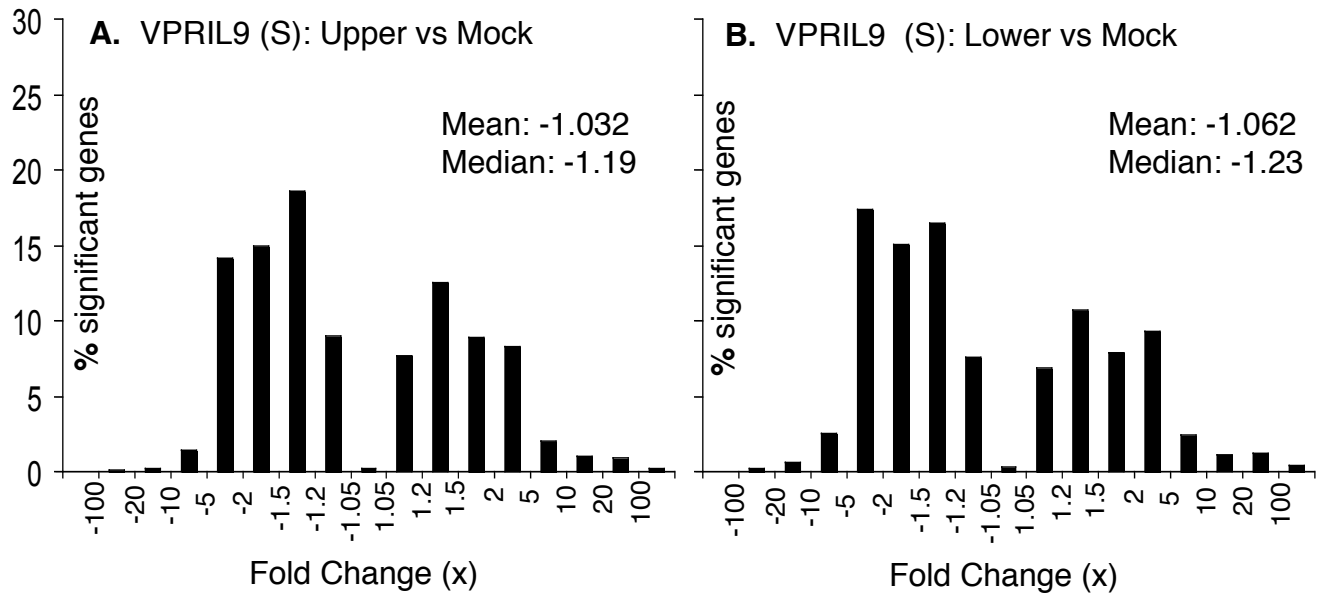

Supplemental Figure 2. Distribution of gene expression changes during infection of genotype VPRIL9. (A) upper infection court; (B) lower infection court. Only genes with significant changes (TST-FDR-adjusted  $p \leq 0.01$ ) are included. A negative fold-change indicates a reduction by that factor. The fold changes were calculated using LMMA contrast analysis with SAS Proc Mixed using GC-RMA normalized data. The mean and median of each distribution were calculated using the log-fold changes.
