# Supplementary material for: Infection and genotype remodel the entire soybean transcriptome
Source: PubMed Central journal article supplement (PMC2662884; doi:10.1186/1471-2164-10-49), 2009-01-26
Supplement: 1471-2164-10-49-S5.pdf [file 1471-2164-10-49-S5.pdf]

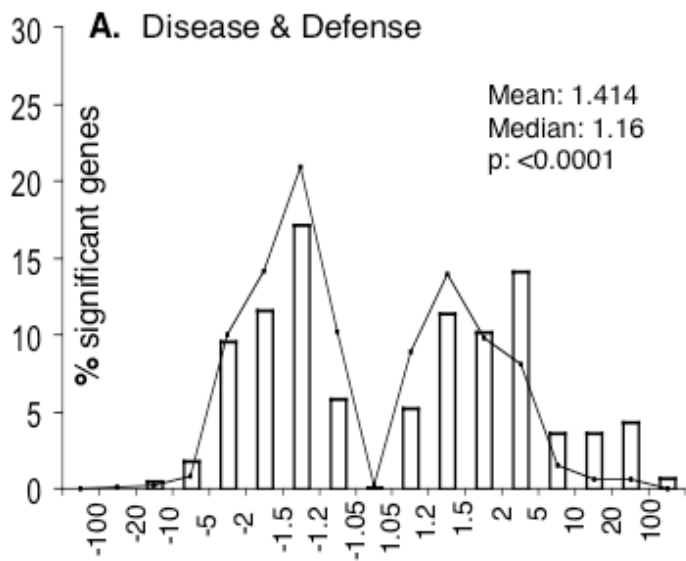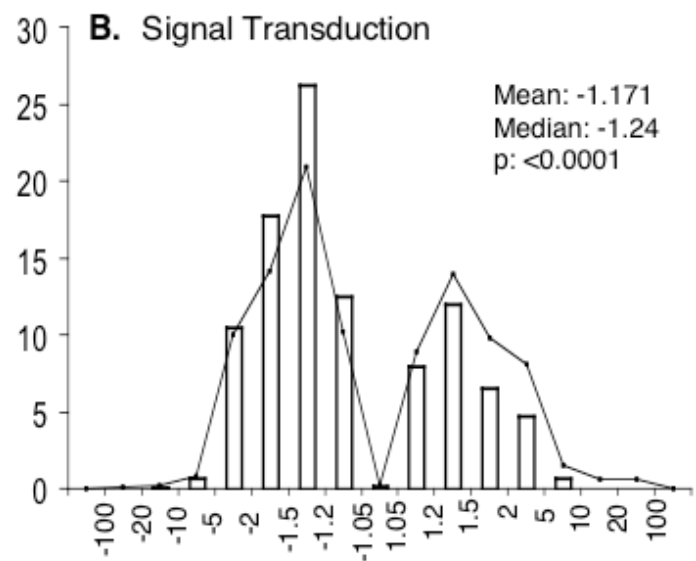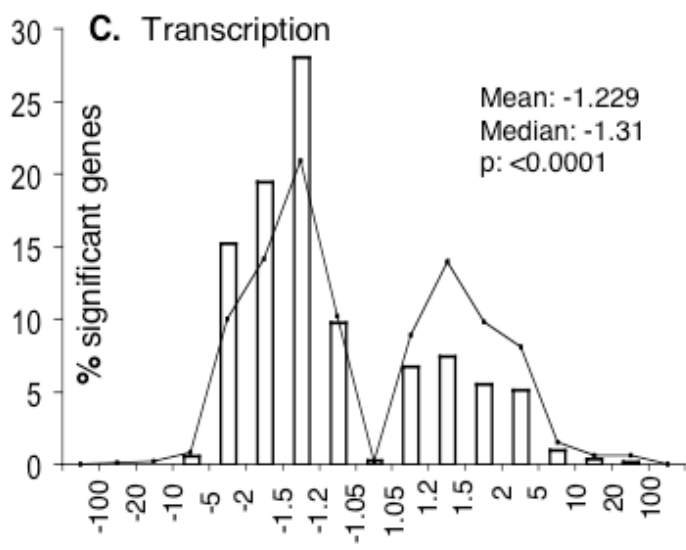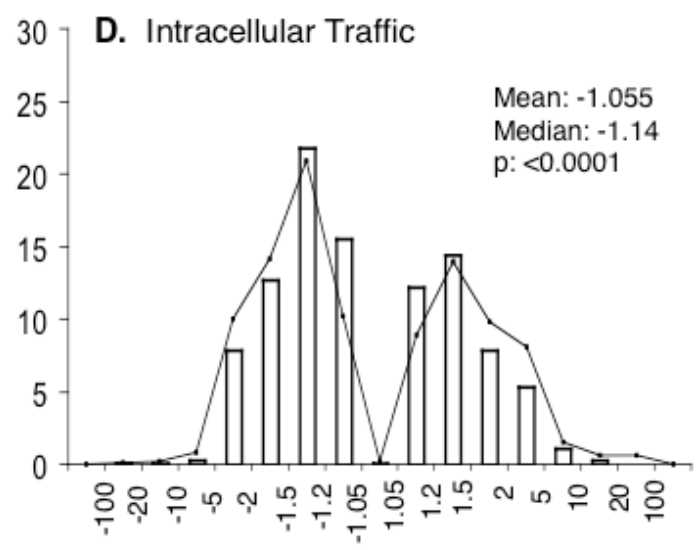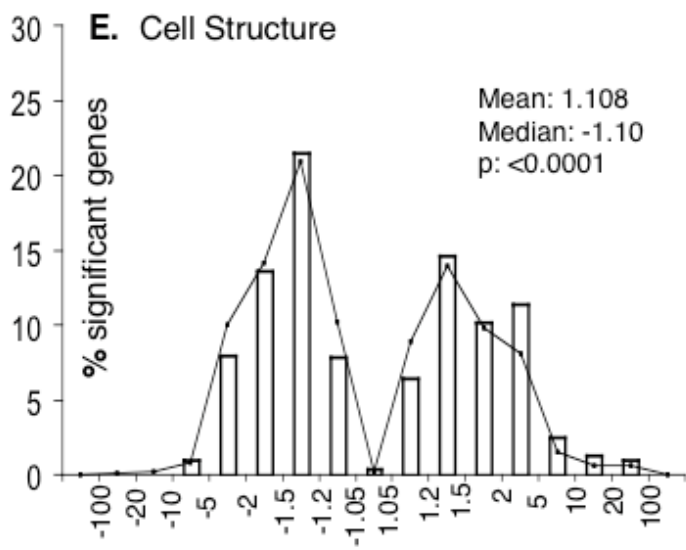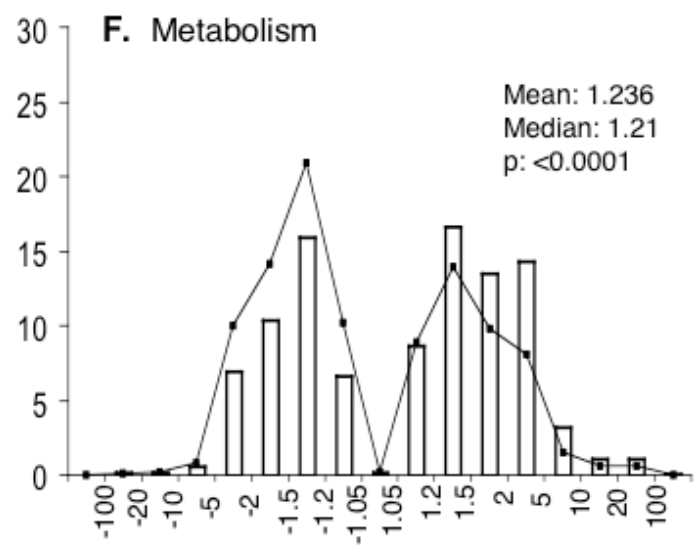

Fold Change (x)

Fold Change (x)

Supplemental Figure 3. Distributions of expression changes in the Sloan upper infection court among six functional categories. Six functional categories relevant to infection are shown. Distributions are shown for genes showing significant infection responses (Upper vs. Mock) in Sloan as revealed by LMMA analysis of GC-RMA preprocessed microarray data with TST-FDR adjusted p value  $\leq 0.01$ . Histograms show the number of genes in each fold change range. The line graph connects dots showing the numbers of genes in all categories in each fold change range. A negative fold change indicates a reduction in expression by that factor. p-values in each panel indicate the result of a Kolmogorov-Smirnov test comparing the distribution of expression changes within the category to the distribution for all genes. The mean and median of each distribution were calculated using the log-fold changes.
