# Supplementary material for: Infection and genotype remodel the entire soybean transcriptome
Source: PubMed Central journal article supplement (PMC2662884; doi:10.1186/1471-2164-10-49), 2009-01-26
Supplement: 1471-2164-10-49-S6.pdf [file 1471-2164-10-49-S6.pdf]

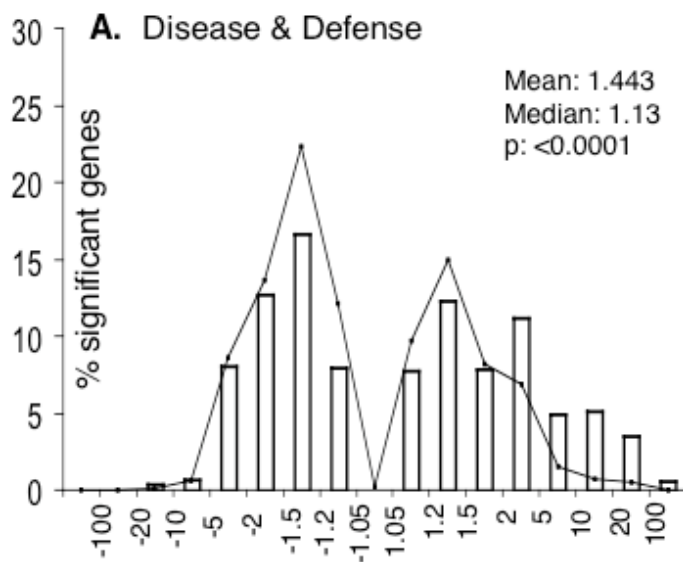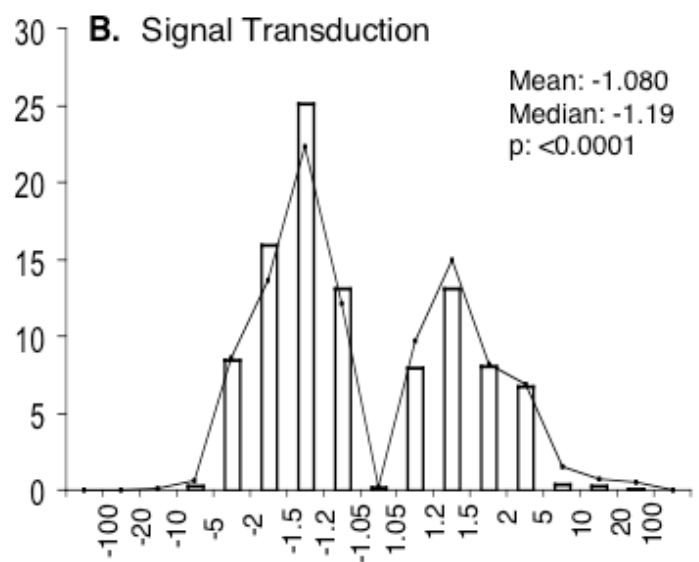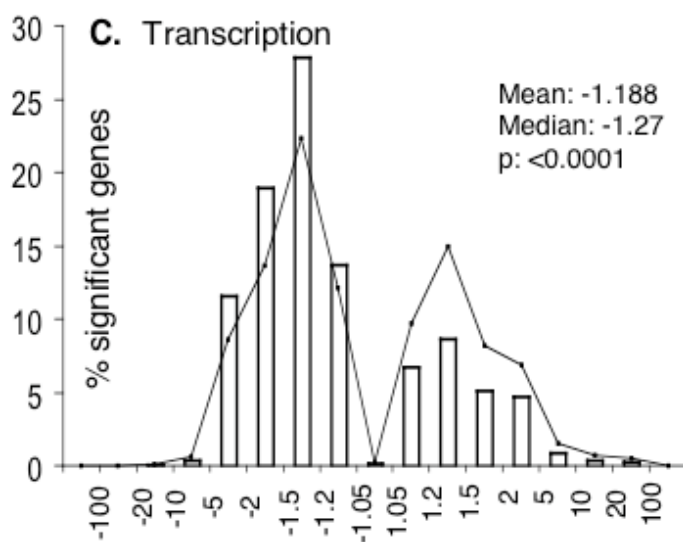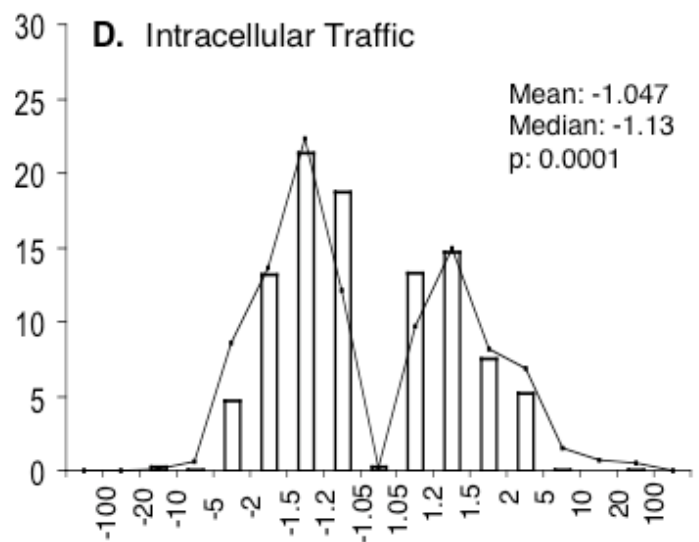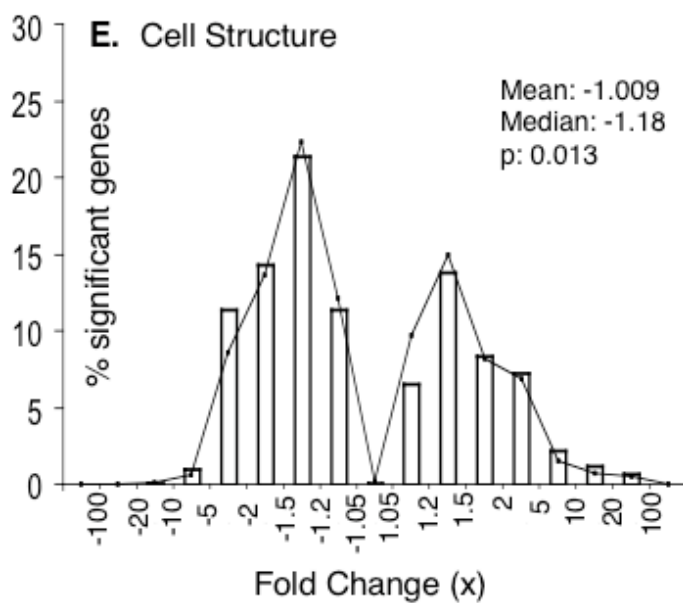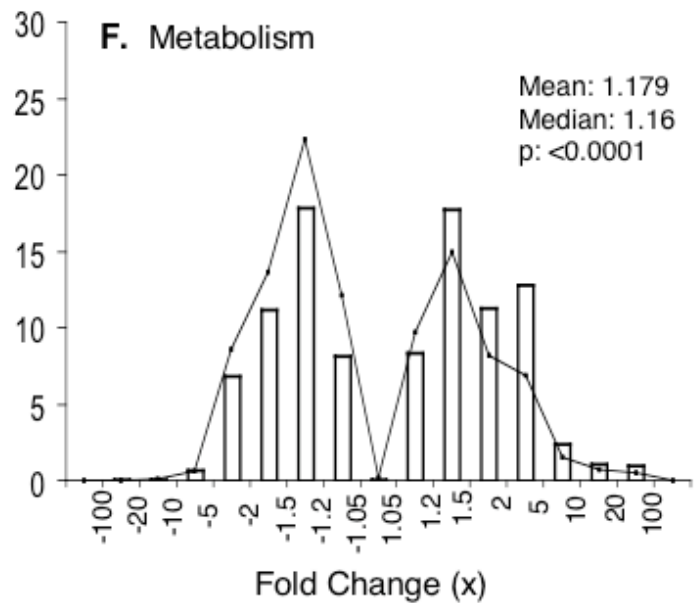

Supplemental Figure 4. Distributions of expression changes in the V71-370 lower court among six functional categories. Six functional categories relevant to infection are shown. Distributions are shown for genes showing significant infection responses (Lower vs. Mock) in V71-370 as revealed by LMMA analysis of GC-RMA preprocessed microarray data with TST-FDR adjusted p value  $\leq 0.01$ . Histograms show the number of genes in each fold change range. The line graph connects dots showing the numbers of genes in all categories in each fold change range. A negative fold change indicates a reduction in expression by that factor. p-values in each panel indicate the result of a Kolmogorov-Smirnov test comparing the distribution of expression changes within the category to the distribution for all genes. The mean and median of each distribution were calculated using the log-fold changes.
