# Supplementary material for: Infection and genotype remodel the entire soybean transcriptome
Source: PubMed Central journal article supplement (PMC2662884; doi:10.1186/1471-2164-10-49), 2009-01-26
Supplement: 1471-2164-10-49-S8.pdf [file 1471-2164-10-49-S8.pdf]

**Supplemental Table 3.** Distributions of expression differences of genes in functional categories compared with the overall differences distribution

| Genotype <sup>a</sup> | Infection court <sup>b</sup> | Expression change range <sup>c</sup> | KS <sub>d</sub> test | Functional category <sup>e</sup> |                     |               |                       |                |            |
|-----------------------|------------------------------|--------------------------------------|----------------------|----------------------------------|---------------------|---------------|-----------------------|----------------|------------|
|                       |                              |                                      |                      | Disease & defense                | Signal transduction | Transcription | Intracellular traffic | Cell structure | Metabolism |
| Sloan                 | Lower                        | Full                                 | n1                   | 850                              | 1,976               | 2,385         | 815                   | 1,097          | 3,337      |
|                       |                              |                                      | n2                   | 23,556                           | 23,556              | 23,556        | 23,556                | 23,556         | 23,556     |
|                       |                              |                                      | p                    | <0.0001                          | <0.0001             | <0.0001       | 0.0008                | 0.006          | <0.0001    |
|                       |                              | ±2X                                  | n1                   | 463                              | 1,470               | 1,639         | 640                   | 730            | 2,230      |
|                       |                              |                                      | n2                   | 16,879                           | 16,879              | 16,879        | 16,879                | 16,879         | 16,879     |
|                       |                              |                                      | p                    | 0.03                             | 0.0002              | <0.0001       | 0.002                 | <0.0001        | <0.0001    |
|                       |                              | ±1.5X                                | n1                   | 269                              | 1,006               | 1,064         | 484                   | 442            | 1,420      |
|                       |                              |                                      | n2                   | 11,200                           | 11,200              | 11,200        | 11,200                | 11,200         | 11,200     |
|                       |                              |                                      | p                    | 0.34                             | 0.018               | <0.0001       | 0.017                 | 0.0003         | <0.0001    |
|                       |                              | ±1.2X                                | n1                   | 92                               | 361                 | 377           | 195                   | 120            | 431        |
|                       |                              |                                      | n2                   | 3,947                            | 3,947               | 3,947         | 3,947                 | 3,947          | 3,947      |
|                       |                              |                                      | p                    | 0.57                             | 0.37                | 0.0008        | 0.23                  | 0.36           | 0.0004     |
|                       | Upper                        | Full                                 | n1                   | 823                              | 1,878               | 2,267         | 784                   | 1,038          | 3,245      |
|                       |                              |                                      | n2                   | 22,758                           | 22,758              | 22,758        | 22,758                | 22,758         | 22,758     |
|                       |                              |                                      | p                    | <0.0001                          | <0.0001             | <0.0001       | <0.0001               | <0.0001        | <0.0001    |
|                       |                              | ±2X                                  | n1                   | 505                              | 1,566               | 1,756         | 664                   | 776            | 2,341      |
|                       |                              |                                      | n2                   | 17,787                           | 17,787              | 17,787        | 17,787                | 17,787         | 17,787     |
|                       |                              |                                      | p                    | 0.094                            | <0.0001             | <0.0001       | 0.0067                | 0.094          | <0.0001    |
|                       |                              | ±1.5X                                | n1                   | 327                              | 1,114               | 1,195         | 504                   | 529            | 1,561      |
|                       |                              |                                      | n2                   | 12,361                           | 12,361              | 12,361        | 12,361                | 12,361         | 12,361     |
|                       |                              |                                      | p                    | 0.21                             | <0.0001             | <0.0001       | 0.029                 | 0.088          | <0.0001    |
|                       |                              | ±1.2X                                | n1                   | 93                               | 389                 | 391           | 219                   | 153            | 501        |
|                       |                              |                                      | n2                   | 4,414                            | 4,414               | 4,414         | 4,414                 | 4,414          | 4,414      |
|                       |                              |                                      | p                    | 0.67                             | 0.0058              | 0.0011        | 0.14                  | 0.12           | 0.0002     |

**Supplemental Table 3** (continued)

| Genotype <sup>a</sup> | Infection court <sup>b</sup> | Expression change range <sup>c</sup> | KS test <sup>d</sup> | Functional category <sup>e</sup> |                     |               |                       |                |            |
|-----------------------|------------------------------|--------------------------------------|----------------------|----------------------------------|---------------------|---------------|-----------------------|----------------|------------|
|                       |                              |                                      |                      | Disease & defense                | Signal transduction | Transcription | Intracellular traffic | Cell structure | Metabolism |
| V71-370               | Lower                        | Full                                 | n1                   | 802                              | 1,813               | 2,228         | 741                   | 1,015          | 3,085      |
|                       |                              |                                      | n2                   | 21,772                           | 21,772              | 21,772        | 21,772                | 21,772         | 21,772     |
|                       |                              |                                      | p                    | <0.0001                          | <0.0001             | <0.0001       | 0.0001                | 0.013          | <0.0001    |
|                       |                              | ±2X                                  | n1                   | 524                              | 1,518               | 1,816         | 662                   | 772            | 2,309      |
|                       |                              |                                      | n2                   | 17,661                           | 17,661              | 17,661        | 17,661                | 17,661         | 17,661     |
|                       |                              |                                      | p                    | 0.18                             | <0.0001             | <0.0001       | 0.0008                | 0.099          | <0.0001    |
|                       |                              | ±1.5X                                | n1                   | 359                              | 1,079               | 1,283         | 507                   | 538            | 1,620      |
|                       |                              |                                      | n2                   | 12,925                           | 12,925              | 12,925        | 12,925                | 12,925         | 12,925     |
|                       |                              |                                      | p                    | 0.17                             | 0.0004              | <0.0001       | 0.0013                | 0.099          | <0.0001    |
|                       |                              | ±1.2X                                | n1                   | 124                              | 385                 | 476           | 244                   | 191            | 513        |
|                       | n2                           |                                      | 4,824                | 4,824                            | 4,824               | 4,824         | 4,824                 | 4,824          |            |
|                       | p                            |                                      | 0.23                 | 0.02                             | <0.0001             | 0.092         | 0.018                 | 0.01           |            |
|                       | Upper                        | Full                                 | n1                   | 736                              | 1,651               | 2,044         | 698                   | 914            | 2,904      |
|                       |                              |                                      | n2                   | 20,418                           | 20,418              | 20,418        | 20,418                | 20,418         | 20,418     |
|                       |                              |                                      | p                    | <0.0001                          | <0.0001             | <0.0001       | <0.0001               | 0.0009         | <0.0001    |
|                       |                              | ±2X                                  | n1                   | 530                              | 1,511               | 1,831         | 653                   | 764            | 2,365      |
|                       |                              |                                      | n2                   | 17,960                           | 17,960              | 17,960        | 17,960                | 17,960         | 17,960     |
|                       |                              |                                      | p                    | 0.12                             | <0.0001             | <0.0001       | 0.0007                | 0.01           | <0.0001    |
|                       |                              | ±1.5X                                | n1                   | 398                              | 1,225               | 1,400         | 538                   | 570            | 1,729      |
|                       |                              |                                      | n2                   | 14,034                           | 14,034              | 14,034        | 14,034                | 14,034         | 14,034     |
| p                     |                              |                                      | 0.15                 | <0.0001                          | <0.0001             | 0.0002        | 0.22                  | <0.0001        |            |
| ±1.2X                 |                              | n1                                   | 143                  | 492                              | 529                 | 275           | 205                   | 614            |            |
|                       | n2                           | 5,438                                | 5,438                | 5,438                            | 5,438               | 5,438         | 5,438                 |                |            |
|                       | p                            | 0.51                                 | 0.006                | <0.0001                          | 0.028               | 0.029         | <0.0001               |                |            |

<sup>a</sup>Genotypes were cultivars Sloan and V71-370. <sup>b</sup>Responses in both upper infection court (Upper vs. Mock) and lower infection court (Lower vs. Mock) were evaluated relative to mock inoculated tissue. <sup>c</sup>The expression changes were calculated by contrast analysis with SAS Proc Mixed using GC-RMA normalized data. “Full” = full range from the greatest down-regulation to the greatest up-regulation; “±2.0X” = from down-regulated 2.0x to up-regulated 2.0x; “±1.5X” = from 1.5x down-regulated to 1.5x up-regulated; “±1.2X” = from 1.2x down-regulated to 1.2x up-regulated. <sup>d</sup>Kolmogorov-Smirnov test for distribution differences between a particular functional category and the whole gene set, for genes with significant infection responses: n1 = number of the significant genes in the functional category; n2 = the number of overall significant genes; p, the p-value generated by 10,000 fold resampling as described in the Methods, and adjusted for false discovery by the TST method. <sup>e</sup>Functional category of each gene drawn from annotation of the Affymetrix GeneChip by the Goldberg group at the University of California, Los Angeles (<http://estdb.biology.ucla.edu/seed>).
