# Supplementary material for: Infection and genotype remodel the entire soybean transcriptome
Source: PubMed Central journal article supplement (PMC2662884; doi:10.1186/1471-2164-10-49), 2009-01-26
Supplement: 1471-2164-10-49-S9.pdf [file 1471-2164-10-49-S9.pdf]

Supplemental Table 4: Genes and primers used for quantitative real time RT-PCR assay.

| Affymetrix ID           | Functional Annotation                 | Product Length (nt) | Sense Primer              | Anti-sense Primer         |
|-------------------------|---------------------------------------|---------------------|---------------------------|---------------------------|
| Gma.441.1.S1_at         | Ubiquitin (AtRUB1)                    | 122                 | AGTGTAGATGCCATATCAGAACC   | CCACCAATAGTAGCCACAATTAC   |
| Gma.16125.1.S1_s_at     | Ribosomal protein S27-like protein    | 137                 | GCTTCTTTCTTACAATGGTTCTAC  | GCCCTGGCACTTAACATCC       |
| GmaAffx.90824.1.S1_s_at | 26S proteasome subunit RPN2a          | 111                 | ATCGGATGTTGTTGATTTTGTC    | AATTGTGCGCTAAATGTTCCC     |
| GmaAffx.90181.1.A1_at   | Actin                                 | 90                  | AAGCACTTCCGATGAACGATAG    | CTTGGCATCACTTAGCACCTTC    |
| GmaAffx.60616.1.S1_at   | Hcr9-OR2A                             | 142                 | GTCTCTCCAACAACCTCAGC      | TCACAGAATCAGCGTACTCAG     |
| Gma.447.1.S1_at         | Defense associated acid phosphatase   | 92                  | CCGATGTACGAAAGCAGTTAC     | CCCTAAATAGTCTCCCTGAATATC  |
| GmaAffx.64261.1.A1_at   | Quinone oxidoreductase                | 138                 | GGATGGCTCAAGGCAACC        | GAGAGAGTATAGTGTGGGAGATAG  |
| Gma.6640.1.S1_at        | At5g66390 (secretory peroxidase)      | 104                 | TTGACCTTGTTGATCTAGTTGC    | CTCGCCATTGCCACTTTG        |
| GmaAffx.18905.1.S1_at   | Cell death associated protein         | 101                 | CTTCCCATTTTCAATTTATATCCAC | CGAAGCCGAGAAGTAAGC        |
| Gma.17993.1.S1_at       | P21 protein                           | 89                  | TGTAATCGCTCAATGCTTCACC    | CAGACGCAGCCCAGACAG        |
| GmaAffx.75675.1.A1_at   | Phenylalanine ammonia-lyase class III | 101                 | TGTGTCAAGCAAAGATTGTTG     | CATCGGCAGATTACTCTACTC     |
| GmaAffx.2799.1.A1_at    | NtPRp27-like protein                  | 89                  | AGGGTTATGATGTTACTGCTC     | AGTCCTCATCTGCTTGTTTC      |
| Gma.16733.2.S1_at       | WRKY4 transcription factor            | 103                 | TTCAACACGGCAATCATAATGG    | GAACTTCAAGCATCAGTCTTAGAG  |
| GmaAffx.29692.1.S1_at   | Chitinase (class II)                  | 76                  | GCAAGAGTGAATGATCGGATTG    | CCAAGTTAGGTCCAGTGTCC      |
| Gma.16911.1.S1_at       | Cytochrome P450 family protein        | 84                  | AGGTCATGTTTACGCTTCAC      | TATATGATCTGTTAGCCACTATTC  |
| GmaAffx.7209.1.A1_at    | UDP-glucose 6-dehydrogenase           | 80                  | GGGAAACGGTAACGGAGAAG      | CAGGCATCGGAGTTGTAGC       |
| GmaAffx.47171.1.A1_at   | Putative resistance protein           | 93                  | ACTGCCCTTGTTAGTTATGAAG    | TATACAGCAATTCCATTCCATTTTC |
| Gma.3473.1.S1_at        | Small heat shock protein              | 95                  | ATGCCATTCTTCCAAGTAGC      | GGAGGAGTAGGGTGGGTTTG      |
| GmaAffx.90984.1.A1_at   | Germin-like protein                   | 77                  | AGAGGACTAGGGTCATAGGC      | ATGAAGGTTGTCTACTTGCTTG    |
| GmaAffx.32612.1.S1_at   | HI4'OMT                               | 101                 | AAGAAATGGTTTCAGTGAGGATAAG | AGCGTGTCTAGATTCAAGTGG     |
| GmaAffx.90059.1.S1_at   | HcrVf2 protein                        | 108                 | GCAGTCTCCCTTCTCTATCAC     | TCGCTCTTCTTCCACCATCC      |
| GmaAffx.79817.1.S1_at   | SGT1                                  | 82                  | GCTTGAGGAATATGAACTGC      | CAAAGTAGCAAACCTTGAGTTG    |
